# Supplementary material
Source: publisher site journal article supplement (https://www.spandidos-publications.com/7740/downloadSupplementary)
Supplement: Supplementary file 1 [file downloadSupplementary]

## Sheet: drug targets for Baicalin
Table SII. Drugs and disease targets.
CASP3
C10orf10
TYR
MAPK14
IL1B
KDM1A
ALOX5
CYP1A1
EIF2AK2
SCNN1A
NFKB1
PIK3CA
CS
TLR4
ZHX2
SOD1
AKT1
PPARG
IL2
CASP9
HKDC1
SMAD3
PTGS2
SMAD2
CYP1A2
NOD2
GSK3B
TNFRSF11B
MAPK1
FABP1
MMP9
UGT1A1
SOST
FN1
NR1H3
METTL3
ADORA2A
BAX
JAK2
BCL2
STAT3
CAMK2G
TNF
FOXP3
TGFB1
MAP2K7
NR3C1
GUSB
FGF2
NEU1
EGFR
DKK1
TLR2
IL6
IL17A
CDKN2A
AR

## Sheet: therapeutic targets for PCOS
DrugBank	GeneCards	OMIM
ESR1	PKHD1	A4GALT
PGR	PKD1	AAAS
CYP3A4	BRCA2	AARS2
SRD5A1	PKD2	ABCC2
SRD5A2	ATM	ABCC9
AKR1D1	CEP290	ABHD5
CYP3A5	TSC2	ABL1
CYP3A7	TP53	ACAM
Slc12a5	PTEN	ACATN
SRD5A3	BRCA1	ACDP4
CYP19A1	MSH6	ACF
CYP2A6	FBN1	ACHRB
CYP2C19	APC	ACHRD
UGT2B7	MSH2	ACHRG
ALB	WT1	ACLP
ABCB1	PTCH1	ACOX
CYP2C9	DICER1	ACOX1
CYP2C8	MLH1	ACP33
PRKAB1	NF1	ACS3
SLC22A2	PMS2	ACTA2
SLC22A1	CC2D2A	ACTA3
SLC47A2	RPGRIP1L	ACTB
SLC29A4	TSC1	ACTG1
SLC22A3	SMARCA4	ACTG2
ETFDH	TMEM67	ACTSA
GPD1	MKS1	ACVRLK3
ACACB	OFD1	AD158
STS	CDH1	AD4BP
AR	BLM	ADA2
ABCC2	FLCN	ADAMTS10
CYP2B6	STK11	ADAMTS17
UGT1A1	RET	ADAMTS2
SHBG	NBN	ADAMTS3
	AXIN2	ADAR
	BAP1	ADCK4
	INS	ADCY6
	AR	ADGRG6
	ATRX	ADGRV1
	PIK3CA	ADH5
	HNF1B	ADHR
	C11orf65	ADMLX
	SCN5A	ADNP
	KCNH2	ADNP1
	RAD50	ADTB1
	KCNQ1	ADTB3A
	SMAD4	ADTG
	CREBBP	ADXR
	LRP5	AE3
	FLNA	AEBP1
	BBS1	AF5Q31
	PALB2	AFF3
	WRN	AFF4
	POLE	AGAT
	VHL	AGK
	DYNC2H1	AGO2
	KMT2D	AGRN
	AHI1	AGS1
	CHEK2	AGS3
	FGFR1	AGS4
	ALMS1	AHDC1
	JAG1	AHI1
	RECQL4	AHSG
	FGFR2	AIF
	BBS2	AIFM1
	MECP2	AIP1
	BRAF	AIRE
	BMPR1A	AKAP450
	BRIP1	AKAP9
	COL4A4	AKT1
	INSR	AKT3
	BBS10	ALDH10
	KRAS	ALDH3A2
	COL4A5	ALG10
	MUTYH	ALG10B
	PRKCSH	ALG14
	BBS4	ALG2
	SEC63	ALG5
	COL3A1	ALG8
	CTNNB1	ALG9
	COL4A3	ALK3
	GANAB	ALK5
	NOTCH2	ALMS1
	PTPN11	ALP56
	USH2A	ALPK1
	NPHP1	ALR
	BBS9	ALS2CR4
	NPHS1	AMH
	BBS7	AMHR
	IFT140	AMHR2
	CHD7	AMN
	AKT1	AMSH
	BBS12	ANAPC1
	TCTN2	ANAPC7
	BARD1	ANCO1
	LMNA	ANCR
	EYA1	ANK2
	KIF7	ANKRD11
	MKKS	ANKRD17
	SDHA	ANKRD25
	POLG	ANKTM1
	NPHS2	ANO1
	NPHP3	ANO6
	GLI3	ANOS1
	MET	ANPRC
	CDKN2A	ANT1
	MRE11	ANTXR1
	HRAS	ANTXR2
	VPS13B	AOS1
	LYST	AP19
	PAX2	AP1B1
	STAT3	AP1G1
	BBS5	AP1S1
	PDGFRA	AP1S2
	CDH23	AP2TF
	MYO7A	AP3B1
	PEX1	AP3D1
	OCRL	APC
	INPP5E	APC1
	CUBN	APC7
	LZTR1	APE
	TTC21B	APECED
	NIPBL	API3
	EVC2	APRF
	TMEM216	APS1
	ALK	APT1
	SUFU	APT1LG1
	CPLANE1	ARA267
	TBX1	ARC92
	WDR19	ARCN1
	LAMB2	ARD1
	KIT	ARD1A
	NSD1	ARFL3
	NLRP3	ARHGAP2
	CYP19A1	ARHGAP31
	SDHB	ARHGDIA
	RAD51C	ARID1A
	AMH	ARID1B
	FSHR	ARID2
	POLD1	ARL13B
	SDCCAG8	ARL2L1
	TCTN1	ARL3
	CASR	ARL6
	FH	ARMC9
	RB1	ARMET
	CACNA1C	ARNT2
	CDKN1C	ARP
	PEX6	ARS
	AIRE	ARSG
	WFS1	ARSL
	TMEM231	ARTEMIS
	ATP7A	ARX
	SOS1	ASAM
	NPHP4	ASPH
	KIAA0586	ASXL1
	MED12	ASXL2
	IFT172	ASXL3
	DOCK8	AT1
	MEN1	ATAD3A
	EPCAM	ATP13A2
	MSH3	ATP1A3
	TCTN3	ATP6AP2
	COL5A1	ATP6B2
	BUB1B	ATP6V0A2
	SLC12A3	ATP6V1B2
	RAD51D	ATP7A
	FOXL2	ATP8A2
	PLOD1	ATPIB
	SHOC2	ATR
	SALL1	ATRX
	B9D1	ATSV
	IDUA	AVIL
	FANCC	AVPR2
	SMARCB1	AWAL
	ERCC6	AXIN2
	SDHD	AYP1
	NOTCH1	B3GALT6
	SLC2A1	B3GALTL
	DNMT3B	B3GLCT
	MITF	B3GTL
	EGFR	B4GALNT2
	TGFBR2	B4GALT7
	PRKAR1A	B9D1
	ZNF423	B9D2
	ATR	BA2R
	GRIN2A	BAAT1
	COL4A1	BACE2
	CAPN10	BAF
	EVC	BAF170
	HNF1A	BAF200
	CHRNE	BAF250B
	RUNX1	BAF57
	FGFR3	BAF60A
	RAF1	BAM
	ERCC4	BAM22
	SURF1	BANF1
	CDKN1B	BAP
	NRAS	BAP1
	NOD2	BBIP1
	CSPP1	BBIP10
	PHOX2B	BBS1
	EP300	BBS10
	PCDH15	BBS12
	FAS	BBS14
	IGF1	BBS15
	FRAS1	BBS2
	ALG8	BBS3
	SHBG	BBS4
	ESR1	BBS5
	GATA3	BBS6
	CBL	BBS7
	CYP17A1	BBS8
	CNTNAP2	BBS9
	PPARG	BCAS3
	ACE	BCL1
	LEP	BCL10
	TMEM237	BCL11A
	TP63	BCL2L9
	SCN10A	BCOR
	HNF4A	BCORL1
	PIK3R1	BCS1
	FMR1	BCS1L
	GATA2	BEK
	PAX6	BF
	ARL13B	BGN
	GJB2	BHD
	TERT	BICRA
	PMM2	BIRC4
	ADIPOQ	BIS
	WAS	BLM
	IQCB1	BLOC1S3
	DIAPH1	BLOC1S5
	DHCR7	BLOC1S6
	KCNJ10	BLOS3
	BSND	BLTP1
	ADGRV1	BMP15
	SLC12A1	BMP2B
	DNMT1	BMP4
	KCNJ2	BMPR1A
	GREM1	BNC1
	MT-CYB	BOK
	RTEL1	BOLA3
	LMX1B	BRAF
	COL1A1	BRAT1
	FREM2	BRCA1
	ACTB	BRCA2
	POT1	BRD4
	KAT6B	BRF1
	SMC1A	BRG1
	EHMT1	BRN3A
	GNAS	BSCL2
	ALG9	BSF3
	SCN1A	BSND
	DYRK1A	BTRCP2
	ARX	BUB1B
	ANK2	BUBR1
	NF2	C10
	TNF	C10orf2
	ARID1A	C10orf6
	KCNE1	C10orf61
	INVS	C11orf9
	COL5A2	C12orf57
	SDHC	C12orf58
	ERCC5	C14orf101
	DNAJB11	C14orf142
	IFIH1	C14orf39
	ERCC2	C14orf58
	CHRNB1	C15orf23
	CD40LG	C15orf57
	TMEM138	C16orf62
	MTOR	C16orf84
	DOK7	C17orf53
	CEP41	C17orf71
	WWOX	C19orf61
	DZIP1L	C1GALT1C1
	ANOS1	C1orf124
	USH1C	C1orf28
	RAPSN	C1orf4
	SOX10	C1orf69
	HSPG2	C1R
	DIS3L2	C1S
	COL2A1	C20orf13
	CDKL5	C20orf140
	TGFBR1	C20orf142
	CLCNKB	C20orf24
	IRF6	C20orf37
	WDPCP	C20orf41
	RELN	C20orf42
	GNRH1	C20orf54
	AKAP9	C20orf72
	CRP	C21orf60
	ZEB2	C2CD3
	UBE3A	C2F
	TTC8	C2orf86
	SMAD3	C3
	TMEM127	C3orf5
	POMT1	C3orf64
	TGFB3	C3orf77
	ACTA2	C4orf1
	TCOF1	C4orf24
	TMEM107	C4orf25
	REN	C5orf14
	TH	C5orf42
	WDR35	C5orf7
	WNT4	C6orf177
	HDAC8	C7orf14
	FREM1	C7orf2
	SDHAF2	C7orf27
	NRXN1	C8orf37
	BMP4	C8orf38
	RASA1	C9orf154
	IGF2	CAB2
	NEK8	CACH
	SLC26A4	CACNA1C
	MUC1	CACNB2
	PLCE1	CACNL1A1
	BBIP1	CALCR
	SATB2	CALM1
	NTHL1	CALM2
	CDC73	CALM3
	SRCAP	CALR
	TGFB2	CAML1
	GLI2	CAP
	IL6	CAP2
	SAMHD1	CAPN15
	AOPEP	CAPON
	FKRP	CARD12
	HCN4	CARD15
	LHCGR	CARS
	ADAMTS2	CARS1
	ZNF469	CASK
	DNMT3A	CASP10
	ANKRD11	CASP8
	MSR1	CASPR
	KCNJ1	CASPR2
	TGFB1	CASR
	MT-ATP6	CAV3
	SOS2	CBL
	KIF1A	CBL2
	HSD17B4	CBP
	MAP2K1	CC2D2A
	CEP164	CCBE1
	FKTN	CCCAP
	ARL6	CCDC100
	PIK3CD	CCDC155
	MVK	CCDC2
	PAX3	CCDC22
	RYR1	CCDC28B
	CHRND	CCDC32
	UGT1A1	CCDC47
	CYP11A1	CCDC8
	UMOD	CCDC84
	BCS1L	CCDC88A
	CFTR	CCG1
	CHAT	CCHL1A1
	TBC1D24	CCND1
	CDK4	CCND2
	SIX1	CCNQ
	MAP2K2	CCR2
	SETD2	CD27
	SIX5	CD27L
	GPC3	CD2BP1
	MYH9	CD46
	EZH2	CD70
	SPRED1	CD96
	CEP104	CDC18L
	CFH	CDC42
	FOXG1	CDC42BPB
	NR5A1	CDC45
	AGT	CDC45L
	NLRC4	CDC45L2
	ROR2	CDC46
	HPRT1	CDC6
	ADAR	CDC73
	FANCM	CDCA7
	PITX2	CDGAP
	TRIM32	CDH1
	C3	CDH11
	SMO	CDH19
	SERPINE1	CDH2
	TREX1	CDH23
	POR	CDK10
	LIFR	CDKN1C
	SEC61A1	CDKN2A
	KDM6A	CDMP1
	ANKS6	CDS1
	CRB2	CDSN
	ERCC8	CDT1
	SMC3	CECR1
	L1CAM	CELA2A
	STAR	CENATAC
	CACNA2D1	CENPF
	HAX1	CENPJ
	GATA4	CEP104
	RAB3GAP2	CEP120
	CHRNA1	CEP152
	SMARCAL1	CEP290
	BMP15	CEP295
	GNRHR	CEP41
	DGKE	CEP57
	CBS	CEP63
	FOXC1	CFAP418
	TBX5	CFB
	SUCLA2	CFH
	XRCC2	CFHL1
	GCK	CFHL3
	COLQ	CFHR1
	GLA	CFHR3
	ELN	CFI
	LRRC56	CHAT
	PEX16	CHD1
	SLC6A8	CHD3
	COQ8B	CHD4
	CUL3	CHD5
	CYP21A2	CHD7
	PRL	CHEK2
	CEP120	CHK2
	LRP2	CHLR1
	KCNJ11	CHN
	DSP	CHN1
	AIP	CHN2
	TTC7A	CHRM3
	IRS1	CHRNA1
	LIG4	CHRNB1
	GFPT1	CHRND
	ERBB2	CHRNE
	TNXB	CHRNG
	IFT80	CHS1
	RNASEH2A	CHST14
	HPS1	CHSY1
	AAAS	CHT1
	TAFAZZIN	CHUK
	AGTR1	CIAO1
	TYMP	CIAS1
	SCN1B	CIB2
	CLRN1	CIP150
	CTLA4	CISD2
	FASLG	CK2A1
	FANCD2	CKAP2L
	MT-ND1	CKN1
	BSCL2	CLAN
	KISS1	CLAPB2
	ALDH3A2	CLAPG1
	ALB	CLAPS1
	FTO	CLC
	GHR	CLCF1
	ADA2	CLCN4
	GDF9	CLCNKA
	IFT122	CLCNKB
	SLC2A10	CLDN10
	SMARCE1	CLDN5
	SOX2	CLIP2
	PDE6D	CLK1
	USH1G	CLK2
	COQ6	CLL1
	RNASEH2B	CLMP
	MPV17	CLPP
	GATA6	CLRN1
	ATP13A2	CMC1
	AP3B1	CMG1
	PREPL	CMG2
	MID1	CMKBR2
	NFIX	CMOAT
	SMARCA2	CNK2
	ERCC3	CNKSR2
	DCDC2	CNNM4
	B9D2	CNOT1
	STAT5B	CNTNAP1
	WHRN	CNTNAP2
	SOX9	COCA2
	GRIP1	COE3
	MTHFR	COG4
	FANCA	COG6
	OTX2	COH1
	CACNB2	COL11A1
	IL1B	COL13A1
	CHRNG	COL18A1
	AMHR2	COL1A1
	PLCG2	COL1A2
	ALDH18A1	COL27A1
	RNASEH2C	COL2A1
	GH1	COL3A1
	GLIS2	COL4A3
	RRM2B	COL4A4
	TREM2	COL4A5
	RBP4	COL5A1
	CGA	COL5A2
	NEK1	COL9A1
	RIT1	COL9A2
	COQ2	COL9A3
	MT-CO1	COLEC10
	FOXP3	COLEC11
	SIL1	COLQ
	F5	COMP
	GJA1	COPB
	GHRL	COPB1
	POMC	COQ8B
	CEP83	COSMC
	ITGA3	CPAP
	SLC25A15	CPE
	SHH	CPLANE1
	SBDS	CPPI
	TRPC6	CPX
	PEX2	CRAM
	WNT5A	CRARF
	KCNJ5	CREBBP
	MYC	CRELD1
	STAT1	CRIPT
	ABCC8	CRLF1
	HYLS1	CRMP5
	MAPK1	CSA
	BDNF	CSB
	AKT3	CSNK1D
	GAMT	CSNK2A1
	STIM1	CSNK2B
	KANSL1	CSPG2
	SRY	CSPG6
	RYR2	CSPP
	LRP6	CSPP1
	CFI	CSS1
	IFT74	CSS2
	XIAP	CSS3
	GPD1L	CSTA
	IL10	CSX
	EDNRB	CTBP1
	ZIC3	CTIP1
	HPS3	CTNNB1
	CAV3	CTNND1
	COQ9	CTSC
	ACTN4	CTU2
	RAB23	CUBN
	SLC3A1	CUL4B
	PIK3R2	CUL7
	PAX8	CXCR2
	MAF	CXCR4
	LEPR	CXorf5
	MYCN	CYLD
	PDSS2	CYLN2
	GATAD1	CYP19
	GATM	CYP19A1
	DCAF17	CYP5
	DCTN1	D4ST1
	THBD	DAAM2
	MAP3K1	DACT1
	PROKR2	DAGLA
	KATNIP	DAK
	KCNE2	DAN
	PMS1	DAP12
	SNTA1	DBR1
	RAD21	DBX
	COMT	DCAF17
	MED13L	DCHS1
	ESCO2	DCLRE1C
	IGF1R	DCPS
	BICC1	DCS1
	SRC	DCTN1
	HOXB13	DDB1
	RRAS	DDP
	FBN2	DDP1
	VCAN	DDR2
	CASP10	DDX11
	MT-CO3	DDX3
	CLCNKA	DDX3X
	VEGFA	DDX58
	PRKAG2	DDX59
	FST	DEAF1
	GP1BB	DENN
	CUL7	DERMO1
	AFG2A	DES
	APOE	DFFRX
	RPGRIP1	DFNB31
	SCN4B	DGCR2
	DHFR	DGCR6
	RETN	DGCR6L
	MEFV	DGK
	B3GALT6	DGKE
	ALPL	DGUOK
	DVL1	DHCR7
	JAK2	DHODH
	CP	DIA
	MYH6	DIAPH1
	ZBTB24	DIAPH2
	WNK1	DIBD1
	RAD51	DIC
	TBX3	DICER1
	ZDHHC24	DIK
	FGF8	DIM1
	EGF	DING
	HPSE2	DIR
	CYS1	DIS3L2
	ALG5	DKC1
	MYLK	DLEU8
	CALM3	DLG1
	INF2	DLG5
	MYH11	DLL4
	NSD2	DLST
	RPS6KA3	DLX3
	PSMB8	DMAHP
	PEX10	DMP4
	SLC6A3	DMXL2
	ERCC1	DNA2
	MLH3	DNA2L
	ZMPSTE24	DNAJA5
	XPNPEP3	DNAJB11
	ESR2	DNAJC21
	IGFBP1	DNASE2
	KLLN	DNC
	FBXL4	DNM2
	FAT4	DNMT3A
	PPM1D	DNMT3B
	FANCG	DOCK6
	AKT2	DOCK8
	UGT1A4	DOK7
	GLIS3	DONSON
	NTRK1	DPAGT1
	SHANK3	DPAGT2
	UGT1A6	DPC4
	PNPLA6	DPF2
	CLCN5	DPP9
	SLMAP	DPR1
	XPA	DPRP2
	RMND1	DPYSL5
	CAV1	DPZF
	UGT1A7	DRG1
	VLDLR	DSCR4
	ST3GAL5	DSCR8
	TSHR	DSCRB
	NDUFA10	DSE
	IGFBP3	DSRAD
	HPS4	DTNBP1
	SCNN1B	DUT
	UGT1A10	DUTT1
	WASHC5	DVC1
	UGT1A8	DVL1
	KISS1R	DVL3
	KCNJ8	DXS1272E
	ATRIP	DXS423E
	TTR	DXS8237E
	CYP1B1	DXS9928E
	SLC19A3	DYRK1A
	TK2	DYRK1B
	EDN1	DZIP1L
	HSD11B1	DZIP2
	GDF6	EAG
	PEX5	EAR3
	SEC23B	EBF3
	DGUOK	EBP
	MAPKBP1	ECGF1
	MAX	EDN1
	CALM2	EDN3
	NR0B1	EDNRB
	RAI1	EED
	PARN	EFE2
	CDC25A	EFL1
	OBSL1	EFTUD1
	COX10	EGFL4
	VPS45	EGFR
	TYROBP	EHHADH
	MSX1	EHMT1
	SLC52A2	EIF2AK1
	KLHL3	EIF2AK2
	ITPR1	EIF2AK3
	SEMA3E	EIF2B1
	SH2D1A	EIF2B2
	CXCR4	EIF2B3
	FANCL	EIF2B4
	NKX2-1	EIF2B5
	MAGEL2	EIF2BA
	TBL1XR1	EIF2C2
	HPS5	EIF2G
	APOA1	EIF2S3
	ADAMTS13	EIF5A
	RAG1	ELA2A
	ENG	ELF4
	HPS6	EMG1
	UGT1A9	EMILIN1
	CD2AP	EMP2
	SLC26A1	EMT
	IFT27	EN1
	IL1RN	ENT3
	NKX2-5	EOGT
	NDUFS4	EOGT1
	EIF2B5	EP300
	PTPRO	EPCAM
	TFAP2A	EPG5
	PLA2G6	ERAL1
	MT-CO2	ERBAL3
	DKC1	ERBB2
	PRKN	ERBB3
	MUC16	ERCC1
	APOL1	ERCC2
	MAPT	ERCC4
	SLC7A9	ERCC5
	SUCLG1	ERCC6
	MMP2	ERCC6L2
	MRPS22	ERCC8
	NDUFV1	ERF
	IFT88	ERI1
	AFF4	ERIS
	NOTCH3	ERK2
	LIPE	ERYF1
	PROK2	ESCO2
	HSD3B2	ESPN
	CYLD	ESR2
	BMP7	ESRRBL1
	SNAP29	EST2
	COPA	EUHMTASE1
	ARHGDIA	EVA
	FANCE	EVC
	CHRM3	EVC2
	PRICKLE1	EVI9
	ABCC9	EXOC3L2
	NR2E3	EXT2
	SKIC3	EYA1
	LDLR	EZH1
	NOS3	EZH2
	SCO2	F5
	MT-ATP8	FAD158
	RAD51B	FADS1
	CYP24A1	FADS2
	WIPF1	FADS3
	SCARB2	FALDH
	AHDC1	FAM105B
	GALNS	FAM111A
	CASP8	FAM149B1
	SCN2A	FAM178A
	DCLRE1C	FAM179B
	ERBB4	FAM20A
	IFNG	FAM20C
	CHEK1	FAM38B
	SIX2	FAM42A
	KIAA0753	FAM50A
	PRF1	FAM58A
	TACR3	FANCD1
	AGXT	FANCM
	PACS1	FANCN
	MYO1E	FAS
	ENPP1	FASL
	NR3C1	FASLG
	SELENON	FAT4
	FSHB	FATP4
	CFAP418	FBL4
	KCNE5	FBN1
	FLNB	FBXL4
	RAB3GAP1	FBXW11
	EMP2	FBXW1B
	BAZ1B	FDH
	CTC1	FDXR
	WNK4	FERMT1
	MAOA	FGD1
	SLC35A3	FGDY
	AVPR2	FGF10
	PKD1L1	FGF9
	UGT1A3	FGFR1
	NDN	FGFR2
	KITLG	FGFR3
	FANCI	FHL1
	DNAI1	FHR1
	PRPS1	FHR3
	FANCF	FIB1
	CDK12	FIBP
	SLC52A3	FIG4
	SNRPN	FIGLA
	CDC42	FIM
	APOB	FIP1L1
	PHF6	FIR
	RLIG1	FIT2
	GNAQ	FJH1
	NAGLU	FKBP10
	AGPAT2	FKBP14
	STXBP1	FKBP65
	TINF2	FKH2
	PRKACA	FKHL1
	LRIG2	FKHL14
	ZFPM2	FKHL15
	PEX12	FKHL7
	PPP1CB	FLCN
	BLK	FLG2
	PIK3CG	FLN1
	WNT10A	FLNA
	SERPINA1	FLNB
	PCNA	FLT2
	TTN	FLVCR2
	CFB	FMR1
	CCND2	FOSL2
	SKIC2	FOXC1
	PIGQ	FOXC2
	AXDND1	FOXE1
	ADNP	FOXG1
	MYO5A	FOXG1B
	NDUFS1	FOXL2
	TBCE	FRAG1
	PDX1	FRAP1
	ASTN2	FRAS1
	SMAD2	FREAC3
	CD40	FREM1
	DGCR2	FREM2
	PBX1	FRP1
	AFP	FRYL
	SPECC1L	FSHR
	DLD	FTL
	PRDM5	FTSJ2
	EIF2B2	FTZF1
	AFF2	FUS2
	CCL2	FXY
	XPC	G19P1
	HLA-DRB1	G1P1
	C2CD3	G5PR
	IRS2	G6PC3
	MMP9	GALE
	DDX41	GALGT2
	NAA10	GAMT
	WDR73	GANAB
	PANK2	GATA1
	ANLN	GATA2
	ARMC9	GATAD2B
	FGF10	GATM
	RAG2	GCSH
	IFT43	GDF3
	IFT81	GDF5
	ANTXR2	GDF6
	NEUROD1	GDF9
	TBX4	GDF9B
	IDS	GDIA1
	ATP6V0A2	GERP
	SLC16A2	GF1
	LHB	GGPS1
	DYNC2I1	GH1
	TUG1	GIRK2
	AICDA	GIRK4
	LZTFL1	GJB2
	ARL3	GLDN
	MDM2	GLE1
	TRDN	GLE1L
	SOX17	GLEPP1
	PDZD7	GLI2
	PGAP3	GLI3
	DGCR6	GLRA2
	CXCL8	GLTSCR1
	ADA	GLUD1
	HLA-B	GLUR3
	ITGA8	GLUT1
	SLC25A4	GLUT10
	GLE1	GLUT2
	SCN3B	GMNN
	PIGW	GMPPA
	PLIN1	GNAI3
	NDUFAF2	GNAQ
	ABL1	GNAS
	SST	GNAS1
	LPL	GNB1
	NDUFS7	GNB2
	FOXC2	GNB5
	DES	GNT1
	HOGA1	GON7
	TRAF3IP1	GP1BA
	FBLN5	GP1BB
	RBBP8	GP9
	KDR	GPC3
	HIF1A	GPC4
	ERBB3	GPD1L
	PEX26	GPR161
	PKD2L1	GPR172A
	SP110	GPR177
	EFEMP2	GPR98
	SAMD9	GPSM2
	CYP11B1	GRB1
	LIMK1	GRHL2
	NGF	GRHL3
	CALM1	GRIA3
	ATP7B	GRIP1
	MAPK3	GRP75
	HELLS	GS1
	PSAP	GS2
	NOG	GSH2
	SLC2A4	GSX2
	KAT6A	GTAR
	POMT2	GTBP
	UNC13D	GTF3B
	NAMPT	GTPBP2
	NEK9	H1-4
	CCND1	H1F4
	POLR1C	H3-3A
	BLOC1S6	H3-3B
	NR2F2	H3F3
	PRKD1	H3F3A
	RUVBL1	H3F3B
	ACTC1	H4C11
	CAVIN1	H4C3
	MYBPC3	H4C5
	SGSH	H4C9
	ABHD5	H4FE
	FN1	H4FG
	SOX3	H4FJ
	HMGA2	H4FM
	GTF2IRD1	H6
	FANCB	HAAO
	BCL2	HADHA
	APP	HAI2
	GBA1	HAP
	ESS2	HARS
	ALG14	HARS1
	DNA2	HARS2
	OXTR	HARSL
	DVL3	HARSR
	NBAS	HAUSP
	PGR	HBLD2
	CIB2	HCCA2
	PCNT	HCCA3
	CRLF1	HCN4
	GTF2I	HD
	F2	HDAC7B
	BMP2	HDAC8
	NDUFAF5	HDAC9
	PYCR1	HDC
	TCF7L2	HELLS
	IGFBP2	HER2
	LRPPRC	HERG
	PON1	HERNA
	NEU1	HF1
	TLR4	HFL1
	SAMD9L	HFM1
	SPTAN1	HGF
	TFAP2B	HHAT
	KCND3	HINT5
	IER3IP1	HIPI3
	SRA1	HIPPI
	SARS2	HIST1H1E
	THADA	HIST1H4C
	CD27	HIST1H4E
	PAX4	HIST1H4I
	CPAP	HIST1H4J
	FOS	HLA-A
	NSDHL	HLA-B
	UNG	HLXB9
	DENND1A	HMG2A
	NTRK2	HMG4
	HUWE1	HMGA2
	RPL11	HMGB3
	MYH7	HMGIC
	CLIP2	HMX1
	EIF2AK3	HNF1B
	IL6ST	HNF4A
	CEL	HNRNPH2
	FAM13A	HNRNPK
	PAFAH1B1	HNRPK
	SRD5A1	HO3
	PPARGC1A	HOP2
	GMPPA	HOPA
	SREBF1	HOX1F
	COQ4	HOX1J
	PEX3	HOX4I
	RNF43	HOXA1
	HFE	HOXA13
	ARVCF	HOXD13
	SGPL1	HPA2
	DHH	HPRT
	KPTN	HPRT1
	GRHPR	HPS1
	KIF14	HPS3
	EPO	HPS4
	ERCC6L2	HPS5
	TRPV4	HPS6
	PIK3CB	HPSE2
	LEMD3	HRAS
	PLOD2	HRI
	ABCB4	HROB
	PKP2	HRPT2
	SYP	HRX
	IL18	HS2ST1
	PEX13	HS6ST2
	RBM8A	HSD17B4
	FOXE1	HSF2BP
	GAA	HSPA9
	DKK3	HSPA9B
	SHOX	HSPC264
	IL1A	HSPG2
	FGF2	HT2A
	RUNX2	HTRA1
	DMD	HTT
	NFKB1	HUEL
	MEF2C	HUNK1
	COLEC11	HUP2
	TAC3	HUWE1
	SLC37A4	HVEC
	IGFBP4	HXC26
	HOXA13	HYAL2
	RECQL	HYLS1
	VDR	HYPB
	GPHN	IBA57
	SCNN1G	IDD
	LOX	IDS
	SOX11	IER3IP1
	ROBO2	IFCR
	MMP14	IFI4
	TRAP1	IFIH1
	PHGDH	IFPS
	DNAH8	IFT172
	DRD2	IFT27
	HBA2	IFT56
	DTNBP1	IFT57
	KCNE3	IFT74
	TUBB3	IGF2
	CHN1	IGKJRB1
	ATP8A2	IKKA
	DOCK6	IL6R
	SMAD6	IL6ST
	NOBOX	IL8RB
	SCNN1A	IMD2
	CUL4B	INI1
	VWF	INPP5E
	RSPO1	INSR
	LAMA5	INT4
	CCNE1	INTU
	GRIN2B	IPAF
	SRD5A2	IPO8
	CACNA1A	IQCB1
	APPL1	IRA1
	DNAH5	IRF6
	PTH	IRIP
	MTRR	IRK1
	RASA2	IRX5
	CRH	ISCA1
	GLB1	ISCA2
	CDH2	ISG43
	GPC4	IT15
	ADCY6	ITBA2
	DSTYK	ITF2
	ACVR2B	ITGA3
	LDHA	ITK
	HDAC4	ITPR1
	STXBP2	JAG1
	EDAR	JAK2
	CLU	JARID1A
	CD4	JARID1C
	FLVCR1	JBTS17
	INHA	JCK
	IL2RA	JJAZ1
	SYNGAP1	JMJD1B
	LAMP2	JMJD3
	CGB5	JPO1
	ALG1	KAL1
	CEBPA	KANK2
	TYR	KANSL1
	HBB	KASH5
	EPHX1	KAT6A
	SCLT1	KAT6B
	PRICKLE2	KAT8
	MPZ	KATNIP
	STAG3	KCNA1
	PRKG1	KCNA9
	HOXA11	KCND3
	ABHD12	KCNE1
	FIG4	KCNE2
	CD8A	KCNE3
	CEP152	KCNH1
	BUD23	KCNH2
	CSF3	KCNJ1
	SLC34A1	KCNJ10
	YY1	KCNJ2
	PPP2R5D	KCNJ5
	EARS2	KCNJ6
	AQP2	KCNJ7
	AKR1C3	KCNK4
	SOD1	KCNK9
	OTC	KCNMA1
	SLC17A5	KCNN3
	AP1S2	KCNQ1
	DNAJC30	KCR1
	HAMP	KCTD1
	DYNC2I2	KDM3B
	GALT	KDM5A
	IL2	KDM5C
	UBE3B	KDM6A
	PDHA1	KDM6B
	PIBF1	KDS
	H6PD	KET
	MNX1	KIAA0036
	PRKDC	KIAA0042
	FOXRED1	KIAA0078
	DYNC1H1	KIAA0083
	SLC12A2	KIAA0089
	PLAT	KIAA0092
	GNS	KIAA0095
	GPSM2	KIAA0122
	IL4	KIAA0146
	NDUFS3	KIAA0160
	JAK3	KIAA0178
	TNNI3	KIAA0192
	GNA11	KIAA0196
	NELFA	KIAA0197
	NPPA	KIAA0225
	IFT56	KIAA0274
	HDAC6	KIAA0309
	NFU1	KIAA0312
	MAGI2	KIAA0328
	MBD5	KIAA0346
	CCDC40	KIAA0347
	HGSNAT	KIAA0372
	FLT1	KIAA0373
	MLPH	KIAA0376
	SLCO1B1	KIAA0381
	SPG21	KIAA0401
	SCN9A	KIAA0423
	IDH1	KIAA0436
	AVP	KIAA0437
	ALDH7A1	KIAA0441
	RANBP2	KIAA0461
	USP7	KIAA0464
	FGF23	KIAA0532
	MYH14	KIAA0540
	GLI1	KIAA0556
	HS6ST1	KIAA0562
	CST3	KIAA0583
	CTCF	KIAA0586
	IL17A	KIAA0594
	LTBP4	KIAA0610
	TXNDC15	KIAA0650
	NR3C2	KIAA0657
	CHD8	KIAA0659
	ITGB3	KIAA0683
	DDX11	KIAA0686
	FHL1	KIAA0705
	WNT7A	KIAA0744
	SH2B1	KIAA0751
	TOE1	KIAA0753
	MRAS	KIAA0755
	B3GALNT2	KIAA0760
	EDNRA	KIAA0784
	PEX7	KIAA0806
	SLX4	KIAA0826
	EIF2B3	KIAA0839
	RNF168	KIAA0849
	CNNM4	KIAA0856
	CFAP410	KIAA0902
	JUN	KIAA0905
	CASP3	KIAA0912
	BRD4	KIAA0928
	DROSHA	KIAA0954
	FKBP10	KIAA0973
	TRPM4	KIAA0974
	MMACHC	KIAA0978
	GREB1L	KIAA0990
		KIAA1001
		KIAA1005
		KIAA1017
		KIAA1034
		KIAA1056
		KIAA1069
		KIAA1082
		KIAA1088
		KIAA1109
		KIAA1111
		KIAA1122
		KIAA1134
		KIAA1140
		KIAA1150
		KIAA1166
		KIAA1171
		KIAA1172
		KIAA1179
		KIAA1204
		KIAA1205
		KIAA1212
		KIAA1231
		KIAA1235
		KIAA1267
		KIAA1270
		KIAA1279
		KIAA1284
		KIAA1290
		KIAA1295
		KIAA1345
		KIAA1395
		KIAA1432
		KIAA1455
		KIAA1506
		KIAA1516
		KIAA1518
		KIAA1526
		KIAA1527
		KIAA1530
		KIAA1546
		KIAA1557
		KIAA1565
		KIAA1566
		KIAA1575
		KIAA1585
		KIAA1596
		KIAA1632
		KIAA1635
		KIAA1650
		KIAA1685
		KIAA1713
		KIAA1731
		KIAA1732
		KIAA1762
		KIAA1803
		KIAA1809
		KIAA1844
		KIAA1858
		KIAA1868
		KIAA1870
		KIAA1895
		KIAA1910
		KIAA1915
		KIAA1951
		KIAA1983
		KIAA2025
		KID
		KIF14
		KIF15
		KIF1A
		KIF7
		KIFBP
		KIND1
		KIP2
		KIRREL1
		KITLG
		KLHL7
		KLLN
		KLP2
		KMT1D
		KMT2A
		KMT2C
		KMT2D
		KMT2E
		KNSL7
		KNSTRN
		KRAS
		KRAS2
		KRG2
		KRML
		KRT14
		KVLQT1
		KYNU
		L1CAM
		LAF4
		LAGE3
		LAK
		LAMA1
		LAMA5
		LAMB2
		LAMS
		LARP7
		LARS
		LARS1
		LARS2
		LAS1L
		LBN
		LBR
		LBX1
		LBX1H
		LCA10
		LEMD2
		LEMD3
		LGN
		LGS
		LH2
		LIFR
		LIG2
		LIG3
		LIG4
		LKB1
		LLH
		LMBR1
		LMN1
		LMNA
		LMOD1
		LMP10
		LMP2
		LMP7
		LMX1B
		LONP1
		LOR
		LOXL
		LOXL1
		LPIN2
		LR3
		LRIG2
		LRP2
		LRP4
		LRP5
		LRP7
		LRRC8C
		LSH
		LSM11
		LSS
		LTBP2
		LTBP3
		LUCA2
		LYST
		LZTFL1
		LZTR1
		M4S1
		MAB21L1
		MAB21L2
		MAD1L1
		MADD
		MADH2
		MADH3
		MADH4
		MAF
		MAFB
		MAGED2
		MAGEG1
		MAGEL2
		MAGI2
		MAN1
		MAN1B1
		MANF
		MAOA
		MAP2K1
		MAP2K2
		MAP3K7
		MAPK1
		MAPKAPK5
		MART2
		MASA
		MASP1
		MASS1
		MAST1
		MAX
		MBD4
		MBS
		MBTPS2
		MCH4
		MCH5
		MCM5
		MCM8
		MCM9
		MCMDC1
		MCP
		MDA5
		MDCR
		MDM2
		MDM4
		MDS
		MDS1
		MDS2
		MECL1
		MECP2
		MED
		MED1
		MED12
		MED12L
		MED25
		MEF
		MEF2C
		MEGF7
		MEGF8
		MEIOB
		MEK1
		MEK2
		MEL
		MEL18
		MEOX1
		MFH1
		MGF
		MGME1
		MGP
		MIC18
		MID1
		MIF
		MINT
		MIPT3
		MIRK
		MITF
		MITR
		MKK2
		MKKS
		MKS1
		MKS3
		MKSR1
		MLC2
		MLCK
		MLH1
		MLL
		MLL2
		MLL3
		MLL5
		MLM
		MLPH
		MMAC1
		MMP14
		MMS21
		MMSET
		MN1
		MNB
		MNBH
		MNK
		MNS
		MNX1
		MOF
		MORF
		MOX1
		MOZ
		MPPB
		MPV17
		MPZ
		MRAS
		MRM2
		MRPS22
		MSF
		MSH2
		MSH4
		MSH5
		MSH6
		MSL1V1
		MSL2
		MSL3
		MSL3L1
		MST
		MTOR
		MTS1
		MTX2
		MULK
		MUP1
		MUSK
		MUTED
		MVK
		MYBPC1
		MYCN
		MYH11
		MYH12
		MYH3
		MYH6
		MYH8
		MYHCA
		MYL9
		MYLK
		MYMK
		MYMX
		MYO18B
		MYO1H
		MYO5A
		MYO7A
		MYO9A
		MYPT1
		MYRF
		MYSM1
		MYST1
		MYST3
		MYST4
		NA14
		NAA10
		NAA80
		NAALADL2
		NADSYN1
		NAF1
		NAG
		NALP12
		NALP3
		NBAS
		NBC1
		NBEAL2
		NBN
		NBS1
		NCAD
		NCAPG2
		NCIE2
		NCRNA00081
		NCS2
		NDN
		NDNL1
		NDNL2
		NDUFAF6
		NECTIN1
		NECTIN4
		NEDD3
		NEK1
		NEK8
		NEK9
		NEPH1
		NEU
		NF1
		NFIX
		NFU1
		NGL
		NHE1
		NHE6
		NHL
		NHLRC2
		NHS
		NIN
		NIPBL
		NKAP
		NKCC1
		NKCC2
		NKX2-5
		NKX2E
		NLRC4
		NLRP12
		NLRP3
		NLS1
		NMYC
		NOBOX
		NOC
		NOC2
		NOD2
		NOG
		NOHLH
		NOLA3
		NONO
		NOP10
		NOS1AP
		NOT1
		NOTCH1
		NOTCH2
		NOTCH3
		NOV
		NPH1
		NPH3
		NPHN
		NPHP1
		NPHP14
		NPHP3
		NPHP4
		NPHP5
		NPHS1
		NPHS2
		NPR3
		NPT2
		NPW38
		NR2E3
		NR2F1
		NR5A1
		NRAS
		NRB54
		NRXN1
		NRXN4
		NS
		NS1
		NSD1
		NSD2
		NSDHL
		NSE2
		NSMCE2
		NSMCE3
		NTE
		NTRKR2
		NTRKR3
		NUP107
		NUP133
		NUP160
		NUP188
		NUP205
		NUP85
		NUP93
		NXN
		NXP1
		OATP2A1
		OAZ
		OBSL1
		OCLN
		OCRL
		OCRL1
		ODC
		ODC1
		ODZ3
		OFD1
		OFIP
		OGDHL
		OPA1
		OPCML
		OPHN1
		ORC1
		ORC1L
		ORC4
		ORC4L
		ORC6
		ORC6L
		ORNT1
		OSC
		OSGEP
		OSX
		OTUD5
		OTUD7C
		OTULIN
		OTX2
		P4HB
		P53
		P53R2
		PA
		PAC2
		PACS1
		PADI3
		PAK2
		PALB
		PALB2
		PAPPAS
		PAR1
		PARK2
		PARK9
		PARN
		PAX1
		PAX2
		PAX3
		PBX1
		PCAR1
		PCDH12
		PCDH15
		PCDH16
		PCGF2
		PCNT
		PCNT1
		PDCD8
		PDE3A
		PDE6D
		PDGFR
		PDGFRA
		PDGFRB
		PDLG
		PDS
		PDZD7
		PDZK6
		PEK
		PER2
		PER3
		PERK
		PERLD1
		PERP
		PEX1
		PEX6
		PGAP2
		PGAP3
		PHF6
		PHF8
		PHGDH
		PHIP
		PHOG
		PHOX2B
		PI4KA
		PI8
		PIBF1
		PIEZO2
		PIG8
		PIGA
		PIGF
		PIGL
		PIGN
		PIGO
		PIGQ
		PIGT
		PIGV
		PIGY
		PIK3C2A
		PIK3CA
		PIK3CD
		PIK3R1
		PIK3R2
		PIK4CA
		PIP5K1C
		PISD
		PITX2
		PITX3
		PJS
		PKBG
		PKD1
		PKD2
		PKDREJ
		PKHD1
		PKP1
		PKS
		PLAG1
		PLCB4
		PLCE1
		PLCG2
		PLDN
		PLOD1
		PLOD2
		PLOD3
		PLXN1
		PLXNA1
		PMP22
		PMPCB
		PMS2
		PMSL2
		PMX2B
		PNPLA6
		PNR
		POF1B
		POGZ
		POLA1
		POLD1
		POLE
		POLG
		POLG1
		POLG2
		POLGA
		POLR1B
		POLR1C
		POLR1D
		POLR3A
		POMP
		POR
		POT1
		POU3F3
		POU4F1
		PPM1D
		PPP1CB
		PPP1R12A
		PPP2CA
		PPP2R1A
		PPP2R3C
		PPP2R5D
		PQBP1
		PRAD1
		PRAK
		PRDM10
		PRDM5
		PREPL
		PRG4
		PRIM1
		PRKACA
		PRKAG2
		PRKAR1B
		PRKCD
		PRKCSH
		PRKM1
		PRKMK1
		PRKMK2
		PRKN
		PRKR
		PRKWNK3
		PROSAP2
		PRPK
		PRPS1
		PRR1
		PRR12
		PRR4
		PRSS11
		PRSS15
		PSA
		PSAP2
		PSAT1
		PSD
		PSDR1
		PSMB10
		PSMB4
		PSMB8
		PSMB9
		PSMC1
		PSMC3IP
		PSMD12
		PSMG2
		PSS2
		PSTPIP1
		PTCH1
		PTEN
		PTH1R
		PTHB1
		PTHR
		PTHR1
		PTOV2
		PTP2C
		PTPN11
		PTPRO
		PUF60
		PVALB
		PVRL1
		PVRL4
		PXAAA1
		PYPAF1
		PYPAF7
		QM
		QRICH1
		RAB18
		RAB23
		RAB27A
		RAB34
		RAB39B
		RAB3GAP1
		RAB3GAP2
		RAB5IF
		RABL4
		RAD21
		RAD26L
		RAD50
		RAD51C
		RAD51D
		RAD51L3
		RAD53
		RAD6A
		RAF1
		RAG1
		RAG2
		RAH
		RAI1
		RALA
		RAMP
		RANBP8
		RAP1GDS1
		RAPSN
		RARB
		RASK2
		RAX
		RBBP2
		RBBP8
		RBL2
		RBM10
		RBM28
		RBM8A
		RBMX
		RBP2
		RBP4
		RBPJ
		RBPSUH
		RBSN
		RC3H1
		RCAD
		RDH11
		RDP
		RECQ2
		RECQ3
		RECQ4
		RECQL
		RECQL1
		RECQL2
		RECQL3
		RECQL4
		RENT3B
		REQ
		RFC1
		RFC4
		RFT2
		RFX6
		RFXDC1
		RGS
		RGS2
		RHOGAP2
		RIC1
		RIEG1
		RIGI
		RIM2
		RIMS2
		RING10
		RING12
		RING1B
		RING2
		RINT1
		RINX
		RIPK4
		RIT
		RIT1
		RLIM
		RNASEH2A
		RNASEH2B
		RNASEH2C
		RNF110
		RNF12
		RNF125
		RNF168
		RNF2
		RNF206
		RNF27
		RNF43
		RNHIA
		RNO
		ROBO1
		ROC1
		ROGDI
		ROMK1
		ROR2
		RP42
		RPA1
		RPC1
		RPGRIP1L
		RPL10
		RPS6KA3
		RRAGC
		RRAS2
		RRAS3
		RRM2B
		RSK2
		RSPO2
		RTEL1
		RTS
		RU2
		RX
		RYR1
		RYR2
		S2P
		SA2
		SAC3
		SAE2
		SALL1
		SALL4
		SAMD9
		SAMD9L
		SAMHD1
		SANS
		SAP155
		SART2
		SAST
		SATB1
		SATB2
		SBDS
		SCAF4
		SCAMC1
		SCARF2
		SCC1
		SCF
		SCIDA
		SCN10A
		SCN11A
		SCN1A
		SCN1B
		SCN3B
		SCN4A
		SCN4B
		SCN5A
		SCNM1
		SCNN1A
		SCNN1B
		SCNN1G
		SCT
		SD
		SDCCAG8
		SDH1
		SDH2
		SDH5
		SDHA
		SDHAF2
		SDHB
		SDHC
		SDHD
		SDHF
		SDS
		SEC23B
		SEC24D
		SEC31A
		SEC31L1
		SEC63
		SEF2
		SERAC1
		SERPINB8
		SET2
		SETBP1
		SETD2
		SF1
		SF3B1
		SGPL1
		SH2D1A
		SH3PXD2B
		SHANK3
		SHARP
		SHFM3
		SHMT1
		SHOC2
		SHOX
		SIAH1
		SIAHBP1
		SIAT9
		SIDS
		SIIR
		SIL1
		SIN3A
		SIP1
		SIX1
		SIX5
		SIX6OS1
		SKAP
		SKI
		SKI1
		SKI2W
		SKIC2
		SKIC3
		SKIV2L
		SLC12A1
		SLC12A2
		SLC12A3
		SLC16A2
		SLC17A2
		SLC18A3
		SLC19A2
		SLC19A3
		SLC20A3
		SLC20A4
		SLC21A2
		SLC25A1
		SLC25A10
		SLC25A11
		SLC25A15
		SLC25A19
		SLC25A21
		SLC25A24
		SLC25A4
		SLC26A4
		SLC27A4
		SLC29A3
		SLC2A1
		SLC2A10
		SLC2A2
		SLC30A7
		SLC30A9
		SLC33A1
		SLC34A1
		SLC39A13
		SLC4A3
[truncated: 406 more rows]

## Sheet: therapeutic targets for NAFLD
DrugBank	GeneCards	OMIM
SLC22A6	PNPLA3	AARS1
UGT1A1	PKD2	ABCA1
SLCO1B1	SLC17A5	ABCA4
SLCO1B3	ATP7B	ABCA7
SLCO2B1	APOE	ABCB1
ALOX5	LMNA	ABCB4
	MARS1	ABCG8
	TNF	ACTA2
	INS	ADAM10
	TP53	ADAM17
	SMPD1	ADH1C
	IL6	AGL
	PPARG	AGXT
	APP	ALDH3A2
	VWF	ALDOA
	HADHA	ALG5
	G6PC1	ALG8
	LRP5	ALPL
	MFN2	ANO1
	NOD2	APC
	TERT	APOB
	TGFB1	APOE
	SQSTM1	APP
	LIPA	ARG1
	HFE	ARPC1B
	HNF4A	ARV1
	PIK3CA	ASPA
	CTNNB1	ATG16L1
	APOB	ATP1A1
	IL10	ATP2A2
	ALB	ATP2C1
	GANAB	ATP7A
	CPT2	ATP7B
	VCP	ATXN2
	ABCA1	ATXN3
	LRRK2	ATXN8OS
	FASN	BCKDHA
	CPT1A	BCKDHB
	POLG	BMPR2
	ADIPOQ	CACNA1F
	FABP1	CADM3
	YARS1	CALHM1
	MIR7-3HG	CARD8
	ACADVL	CAV3
	STAT3	CBLB
	CYBB	CCL2
	NOTCH1	CCL5
	LPL	CCR2
	ACADM	CD36
	PNPLA2	CDH17
	GPT	CHCHD2
	SERPINA1	CILP
	PPARA	CLCN5
	PRKN	COL1A1
	PTEN	COL2A1
	COL1A1	COL4A1
	APOA1	COL4A2
	BCKDHB	COL9A3
	LDLR	COLGALT1
	ACE	COPD
	CBS	COX6A1
	PINK1	COX7A2
	KRAS	CPT1A
	FABP2	CRB2
	BSCL2	CTLA4
	CFTR	CX3CR1
	FAS	CYBA
	IFNG	CYBB
	ACOX1	CYBC1
	HBB	DBT
	APC	DHTKD1
	CRP	DHX16
	AKT1	DNAJB11
	LEP	DNAJC6
	CD36	DNM2
	EGFR	DOCK11
	NR1H4	DYM
	F2	DYNC1H1
	IL1B	DZIP1L
	INSR	ECE1
	GARS1	ECM1
	SREBF1	EDN3
	SOD1	EDNRB
	MTTP	EGR2
	JAG1	EIF2AK4
	TTR	EIF4G1
	MTHFR	ELOVL1
	TLR4	ELOVL2
	CYBA	ELOVL3
	CYP2E1	ELOVL4
	GGT1	ELOVL5
	CTLA4	ELOVL6
	HNF1A	ELOVL7
	FBN1	ENO3
	ABCB11	ENPP1
	AR	FA2H
	HLA-DRB1	FAAH
	ABCB4	FAAH2
	FABP4	FABP1
	LIPC	FABP12
	SMAD4	FABP2
	NOS3	FABP3
	ACADS	FABP4
	BRAF	FABP5
	HRAS	FABP6
	HSPB1	FABP7
	SLC25A13	FABP9
	SCP2	FADS1
	TSC1	FADS2
	CCL2	FADS3
	CP	FADS6
	ITCH	FAR1
	APOC3	FAR2
	VDR	FARSA
	MET	FARSB
	CDKN2A	FASN
	ATM	FAT1
	CASP8	FAT2
	MSR1	FAT3
	TNFRSF1A	FAT4
	ACACA	FAXDC2
	PTPN11	FBLN5
	NFE2L2	FBXO7
	HMGCR	FFAR1
	HMOX1	FFAR2
	AFP	FFAR3
	IGF1	FFAR4
	NRAS	FGD4
	PCSK9	FIG4
	HSD17B13	FIT2
	CYP3A4	FITM1
	HLA-DQB1	FMO1
	NLRP3	FMO4
	AGT	FOCAD
	RBP4	FOXC2
	MUC1	FOXD3
	CFH	G6PC
	ICAM1	GAA
	OTC	GALC
	SERPINE1	GANAB
	MYH9	GARS1
	ALPL	GATA4
	PC	GBA1
	CETP	GBE1
	JUP	GBF1
	FABP3	GCGR
	MPV17	GDAP1
	LCAT	GDNF
	KRT18	GFAP
	MMP9	GIGYF2
	ABHD5	GLA
	FADS2	GLE1
	MEFV	GLS2
	ATG7	GNB4
	GCK	GP1BA
	PON1	GRD1
	SCD	GRK1
	MTOR	GYG1
	UCP2	GYS1
	LITAF	GYS2
	MPO	HADHA
	FABP12	HARS1
	CAV1	HBA1
	PPARGC1A	HBA2
	NR1H2	HBB
	UGT1A1	HEXA
	NR1H3	HEXB
	LEPR	HLA-B
	CCND1	HLA-DPB1
	TNFRSF11B	HLA-DQA1
	NFKB1	HLA-DQB1
	FASLG	HMOX1
	CXCL8	HNRNPA1
	OFD1	HNRPA2B1
	VEGFA	HOXD10
	CAT	HSD17B10
	TF	HSD17B13
	LRP6	HSPB1
	SLC2A1	HSPB8
	RPGRIP1L	HTRA2
	ALDOB	HTT
	SLC27A4	IGHMBP2
	GFER	IKBKG
	ARG1	IL10
	SMAD3	IL10RA
	BRCA1	IL10RB
	IL1A	IL23R
	DNAJB11	IL37
	FLNA	IL6
	IL1RN	INAVA
	ACTA2	INF2
	STAT1	IRF5
	PTGS2	IRGM
	RAF1	ITCH
	BRCA2	ITGA3
	PEX2	ITPR3
	IFIH1	JAG1
	CTSD	JPH1
	ESR1	JPH3
	CYP7A1	JUP
	TLR2	KARS1
	ASS1	KIF1B
	HGF	KRT5
	MYC	LAMP2
	HAMP	LARS1
	MT-CYB	LCAT
	TM6SF2	LDHA
	GRN	LEAP2
	RXRA	LIPA
	PKLR	LITAF
	HSPD1	LMNA
	IDH1	LPA
	ABCC2	LRP5
	RETN	LRP6
	FABP5	LRRK2
	ALMS1	LRSAM1
	AGTR1	LYN
	IL18	MAPT
	HIF1A	MARS1
	THBD	MEF2A
	TUG1	MFGE8
	HP	MFN2
	IRS1	MME
	TARDBP	MMP3
	BCL2	MORC2
	C3	MPO
	PRMT7	MPV17
	SIRT1	MPZ
	IL4	MTHFR
	XBP1	MTMR2
	TGFBR2	MUC1
	ATP2A2	NAGA
	ALDH2	NAGLU
	CYP1A2	NBAS
	FABP6	NCF1
	TH	NCF2
	ENPP1	NCF4
	BDNF	NDP
	TREM2	NDRG1
	AIFM1	NEFH
	SOD2	NEFL
	APOA5	NEK8
	NEU1	NEK9
	ELOVL6	NLRP1
	SLC27A2	NOD2
	LIPE	NOS3
	MAPK8	NOTCH1
	NOS2	NOTCH2NLC
	STK11	NPC1
	PEX26	NPC2
	GSTM1	NSMCE3
	ABCB7	OCRL
	FTL	PDCD1
	MMP1	PDE11A
	GSTP1	PDE8B
	HBA1	PDK3
	DGAT1	PDZD7
	MMP2	PFKL
	SERPINC1	PFKM
	SCARB2	PGAM2
	SLC27A5	PHKA2
	IL17A	PHKB
	CXCR4	PHKG2
	EGF	PHOX2B
	SI	PHYH
	MLXIPL	PINK1
	PMS2	PKD1
	HLA-DQA1	PKD2
	IFT172	PKDREJ
	DSP	PKHD1
	CASR	PKLR
	ACTB	PLA2G6
	COL3A1	PLAU
	ELANE	PLEKHG5
	CPS1	PLP1
	COPA	PMP2
	NDUFS1	PMP22
	HK1	PNKP
	NR1I2	PNPLA2
	SDCCAG8	POFUT1
	DNMT1	POGLUT1
	LPIN1	POLR3B
	EIF2AK4	PON1
	SLC40A1	PON2
	CYP1A1	PPM1K
	FN1	PRKAG2
	JUN	PRKAR1A
	AKT2	PRKCSH
	SLC27A1	PRKN
	NRG1	PRNP
	PDGFRB	PROM1
	YAP1	PRPS1
	PCK2	PRX
	IFNA1	PSAP
	EIF2AK3	PSEN1
	DGAT2	PSEN2
	MLH1	PSENEN
	TNFSF11	PTEN
	CLCNKB	PTPA
	AHSG	PTRH2
	TGFBR1	PYGL
	BMP6	PYGM
	FGF21	RAB32
	VCAM1	RAB7
	CEBPA	RELA
	FOXO1	REN
	HNRNPA1	RET
	ADAR	RHCE
	BAX	RHD
	PIK3CG	RINT1
	SPP1	RNF213
	MAPK1	RNF220
	SCARB1	ROBO4
	PSMB8	SAG
	BBS5	SAR1B
	IL6R	SBF1
	TIMP1	SBF2
	PPARD	SEC61A1
	ALPP	SEC63
	GPT2	SERPINA3
	PLAU	SFRP4
	CASP3	SFTPA1
	MSH6	SFTPA2
	MSH2	SH3TC2
	KRT7	SIAE
	MIF	SLC12A6
	CEL	SLC17A5
	RUNX1	SLC19A3
	PIK3CD	SLC25A16
	DYSF	SLC25A6
	F3	SLC27A2
	FFAR4	SLC27A3
	CES1	SLC27A4
	FTH1	SLC27A5
	FGA	SLC27A6
	SERPINF1	SLC37A4
	SMARCAL1	SLC52A3
	BMP4	SLURP1
	GLUD1	SMAD6
	GC	SMPD1
	ADA2	SNCA
	AKR1D1	SP110
	EIF2B4	SPG11
	HJV	SQSTM1
	TJP2	STAT3
	MT-ND6	STX3
	PEMT	STXBP2
	TFR2	SURF1
	CYP2A6	SYNJ1
	ACACB	TBP
	SLC6A3	TG
	CD4	TGFB1
	DNAH8	TLR5
	LPA	TNFRSF11A
	CD14	TNFRSF11B
	CYP1B1	TNNI3K
	CYP17A1	TREM2
	LRPPRC	TRIM2
	XDH	TRMU
	TRIM32	UCHL1
	AGPAT2	UMOD
	PRKCD	USP9X
	GAPDH	USP9Y
	ERCC2	VCP
	EZH2	VPS13C
	FXN	VPS35
	MT-ND3	VWF
	SREBF2	YARS1
	MYH14	ZAP70
	CNR1	ZFAT1
	CFI	ZNF687
	CLU	AACT
	GHRL	AARS
	MYL2	ABC1
	SLC10A1	ABCR
	FGF23	ACTSA
	RB1	AD3
	MBOAT7	AD4
	SMARCA4	ADH3
	EPHX1	AGS1
	GSTT1	ALDH10
	IL13	ALO17
	SELE	ANT3
	ADH1C	APG16L
	GCKR	APRF
	NGF	ARC41
	SHH	ATP2B
	PLIN1	ATX2
	IGF1R	BCATE2
	KRT8	BIT1
	LOX	C1orf106
	CCL5	C20orf142
	RUVBL1	C20orf54
	HMGCS2	CARD15
	CXCL10	CDH16
	AGER	CIG30
	POLR3A	CLCK2
	GCG	CLP46
	WNT1	CMKBR2
	EYA1	CRFB4
	GSK3B	DDX16
	TULP1	DFFRX
	PRKAA2	DFFRY
	POR	DNCL
	MAOA	DP3
	AHR	DZIP2
	MYD88	EIF4G
	CHEK2	EROS
	LCN2	F8VWF
	CDKN1A	FABPB
	CCN2	FACVL1
	TNFAIP3	FAM26C
	RIPK1	FARSLB
	A2M	FAT
	DPP4	FATP3
	FOS	FATP4
	RELA	FATP5
	SLC30A10	FATP6
	MDM2	FBX7
	CDKN3	FIT1
	SERPINA3	FKHL14
	CCR2	FRPHE
	EP300	G19P1
	BMP2	G6PT
	HSPA5	G6PT1
	NDUFAF6	GA
	STING1	GARS
	ATF4	GCN2
	LMBRD1	GDE
	EIF2AK2	GLE1L
	POMC	GLT25D1
	ACSL3	GPR13
	ADIPOR2	GPR40
	SKIC2	GPR41
	FTO	GPR43
	GPI	GYS
	SELP	HADH2
	SHBG	HARS
	PLIN2	HD
	SPINK1	HE1
	CDK4	HOPS
	FMO3	HOX4D
	NPPB	HSP27
	ATP1A1	IFNB2
	EIF4G1	IGSF4B
	CYP2B6	IL10R
	XPNPEP3	IL1F7
	IRS2	ILLBP
	GH1	JCK
	DDIT3	JP1
	ADH1B	JP3
	KRT19	KARS
	ADRB2	KIAA0214
	PRKDC	KIAA0274
	DNMT3A	KIAA0517
	SF3B1	KIAA0642
	C4A	KIAA0720
	STAR	KIAA1421
	CTSB	KIAA1441
	TNFRSF1B	KIAA1630
	APOA2	KIAA1797
	GNMT	KIAA1840
	BGLAP	KIAA1985
	CPOX	KROX20
	HSPA4	LARS
	NLRC4	LCE
	CD44	LMN1
	UCP1	LRG47
	TBP	MADH6
	MTRR	MADM
	CDC42	MARS
	FGF19	MEGF1
	GDF15	MEM3
	PPIG	MJD
	ANGPTL3	MLSTD1
	CYP4A11	MLSTD2
	BCAP31	MMAC1
	GCLC	MNK
	IGFBP1	MTBT1
	GFPT1	MTMR13
	PALB2	MTMR5
	PHGDH	NACP
	TLR3	NAG
	CIDEC	NALP1
	TKT	NDNL2
	KL	NEMO
	VIM	NFKB3
	MAPK14	O3FAR1
	HMGB1	OMI
	GHR	OPG
	IGFBP3	PAHX
	NAT2	PARK2
	CD274	PARK7
	SLC2A4	PARK8
	FGB	PDNP1
	TPM1	PEN2
	GREM1	PGAMM
	SPTAN1	PGY1
	CHUK	PGY3
	LGALS3	PK1
	IL21	PNK
	UGT1A9	PON
	TCF7L2	PP2CM
	HLA-C	PPH1
	PARP1	PPP2R4
	CUL3	PRIP
	CD55	PROML1
	BMPR1A	PUM
	CLCNKA	RANK
	DICER1	RHOK
	FLT1	RPC2
	CHIT1	SAP1
	AKT3	SCA8
	FGFR4	SCDR9
	DBI	SCYA2
	NPY	SCYA5
	EPHX2	SFTP1
	UGT1A4	SMUBP2
	LIFR	SPAT
	GDF2	SRK
	PRKAA1	SSC1
	ALG6	SSC2
	CEBPB	STMY1
	IL1R1	STX3A
	GPBAR1	TACE
	CLCN2	TAL
	UGT1A6	TAN1
	MATR3	TIL3
	THBS1	TMEM16A
	PEPD	TSE1
	CREB1	UNC18B
	IFNA2	WND
	GAN	YARS
	UGT1A7	ZNF406
	DPM1	ACT
	PPIB	ATGL
	UCP3	BLBP
	ANGPT2	C14orf173
	SOST	C17orf62
	TET2	CHN1
	AXL	CMT4B2
	GSR	COLEC5
	PIGA	D17S136E
	MAT2A	DBP2
	TAP1	DNECL
	GPX4	E2IG1
	TBX20	ERAB
	NAMPT	EVR2
	GLS	FACE
	APPL1	FAXDC1
	CHI3L1	FHL5
	GPAM	FIL1Z
	TOR1A	FIP3
	HSD11B1	GDA
	NR0B2	GPR120
	MUTYH	IDD
	MMP13	IFI1
	ADIPOR1	IT15
	PSMB9	KIAA0180
	TIMP2	KIAA0473
	ETV6	KIAA0926
	NADK2	KIAA0955
	CD59	KIAA1338
	CD163	KIAA1618
	PPP1CB	KLHL1AS
	RPS27A	KTELC1
	S100A9	LRP7
	PLCG2	MAGEG1
	ACLY	MCP1
	DHCR24	MDR1
	SPARC	MDR3
	SLC39A8	MFH1
	YY1	NPPS
	TAP2	OCIF
	ALAD	OCRL1
	PLA2G4A	PARK1
	HSP90AA1	PMX2B
	TLR5	RAK
	SLC6A4	RFT2
	XPR1	SAC3
	AKR1A1	SARA2
	MAP3K5	SCA2
	CSF1	SCA3
	VTN	SMAD1
	LTF	STM2
	CAD	TSLL1
	HDAC9	VLACS
	GSS	ZCWCC1
	HLA-DPB1	ZIZ2
	CRAT	AD1
	EPAS1	CAR
	ITPR3	DEFCAP
	TXN	FALDH
	TLR9	IL1H4
	RARS1	KCC3
	SP1	KIAA0852
	SMAD7	LR3
	ABCC3	M6S1
	CXCR3	MCAF
	SLC25A1	NDPP1
	CCL3	NECL1
	STUB1	NEP
	RPS6KA3	PGR4
	ATF6	PRSS25
	WNT5A	SPG2
	UGT1A8	C3orf9
	PRKACG	CARD7
	ACE2	CHN2
	ARPC1B	HGF
	PRDX1	IL1RP1
	CHCHD2	SYNCAM3
	MERTK
	NDUFB3
	PPM1K
	S100A8
	SLC25A3
	MST1
	CA2
	SLC39A4
	PRL
	UGT1A10
	NR5A2
	NPC1L1
	TNFSF10
	DNASE1
	PIK3CB
	CNTNAP2
	ANXA11
	NQO1
	EPRS1
	APOH
	IARS1
	CYP46A1
	CFAP418
	NR1I3
	STAT5A
	KEAP1
	DSG1
	ABCG1
	SNAI2
	BTNL2
	HSPA1A
	APOA4
	PKM
	HDAC1
	IRF1
	SERPINA6
	POLR1C
	CCR1
	SOAT2
	ATP5F1A
	RARRES2
	TPM3
	ITGA8
	GPX1
	DARS1
	FBXW7
	HCFC1
	CCK
	CACNA2D1
	CASP9
	FARSA
	SERPINH1
	MMP7
	HSPA9
	GLP1R
	CCL20
	HPS1
	CYP4F2
	TPM2
	CDH2
	RPL5
	NOS1
	IL6ST
	TMPO
	MICA
	IFNL3
	GOT2
	SNTA1
	TRAP1
	SHC1
	SCT
	CLRN1
	IRF3
	BIRC5
	BHMT
	NOP10
	SLC9A6
	HSPA8
	ADRB3
	NDUFA13
	MRPS7
	ERN1
	FDFT1
	DKK1
	IL33
	CEACAM5
	RPL10
	TMPRSS6
	PRKAB1
	P4HB
	HLA-DRA
	OGG1
	TRAF6
	KDM1A
	DRD2
	CCL11
	HDAC8
	UBE3A
	DDX3X
	CHRM3
	SDC1
	TGM2
	RPS6KB1
	USF1
	CXCL9
	MYB
	GOLM1
	ATAD3A
	THBS2
	ALOX12
	CRH
	ADK
	BID
	EDA
	SFRP4
	ALDH9A1
	UGT1A3
	CDK1
	UPB1
	RPS10
	TLR1
	COA8
	CYLD
	YWHAE
	ERLIN1
	COQ5
	CLTC
	TRAF3
	PNPT1
	IFNAR1
	USP9X
	GRB2
	ANGPTL8
	SIRT3
	VARS1
	BLVRA
	SLC25A10
	DBH
	IAH1
	MAP3K7
	SULT2A1
	WASHC5
	COX6B1
	BIRC3
	PTX3
	PLAUR
	SLC25A12
	PRKCA
	CCN6
	FUT2
	PLTP
	CCL4
	MDH2
	PDK4
	HUWE1
	PRKD1
	IGFBP2
	IL18BP
	POSTN
	ACSM2B
	NOX4
	WWTR1
	PLCB1
	ELAVL1
	PRKCQ
	AREG
	NRP1
	OSM
	DNAJC21
	SIRT6
	QARS1
	SLC1A3
	GRIA3
	HNRNPH1
	SLC25A22
	SLC13A5
	MYH2
	RPLP0
	SLC39A14
	CYP2J2
	RPS24
	KCNMA1
	PTPN1
	PXDN
	THRB
	ENPP2
	MIR22HG
	MYO6
	PRSS1
	CES2
	ACER3
	PRDX5
	MASP2
	SLC19A1
	EGR1
	TXNIP
	SUFU
	EFTUD2
	ADAMTSL2
	HTR2A
	TUBA1A
	ATP5F1E
	CDH4
	FNDC5
	STEAP4
	DOCK7
	HSPA6
	CCT5
	GCGR
	IRGM
	KAT5
	TSPO
	FOXA1
	FHIT
	LBP
	UBE2L3
	HMGA1
	C11orf65
	ADH5
	HSP90B1
	CD68
	ERLIN2
	EEF1A1
	STEAP3
	SPTBN1
	RDH5
	SERPINF2
	RORA
	DNAAF11
	PRPF8
	CFD
	TRIB1
	DYNC2I2
	TUBB
	PRDX6
	E2F1
	TSEN2
	SERPINA7
	KLF6
	CYP4F3
	WNT3A
	COL13A1
	XRCC6
	NEDD4L
	TFEB
	SLC5A2
	ANXA2
	ONECUT2
	LECT2
	ECH1
	MASP1
	IL1RAPL2
	ATG5
	KIF11
	AOC3
	SLC4A4
	RPS17
	TXNRD2
	CISD2
	DRD3
	HSP90AB1
	TNC
	TRIM8
	ROCK1
	IL11
	SARDH
	GOT1
	TRB
	NNMT
	RIPK3
	TRIM21
	OLR1
	P2RX7
	CFLAR
	EPHA2
	TFAP2B
	MGAM
	VPS53
	TLR6
	TRAPPC9
	UGT1A5
	SLC34A2
	AUP1
	DHX9
	ALPI
	GAL
	PPP2R2B
	CEACAM1
	CLCF1
	CNR2
	MICB
	DRD1
	CCT2
	PTPRD
	MAPK9
	FGL1
	PPP3CA
	CSNK2B
	CASP7
	CTSS
	TP53BP1
	OGT
	CANX
	CTPS1
	RUNX3
	PIN1
	BPTF
	CD38
	KLB
	HNRNPK
	AZGP1
	GSK3A
	COLGALT1
	IL19
	ZPR1
	CASP2
	FCN2
	MRC1
	SERPINA12
	DRD4
	XRCC3
	KMT2C
	IL23A
	HLA-DRB5
	XRCC5
	BRAT1
	SIRT2
	SPEN
	PHB1
	MPC1
	STOX1
	CDH5
	ADH1A
	SCAP
	APEX1
	SOD3
	ARNT
	KLF4
	ADAMTSL1
	DDB1
	PDE4A
	TFF3
	APLN
	SH2B1
	YBX1
	SLC38A8
	CYP8B1
	IGF2BP2
	LGALS3BP
	TSLP
	CX3CL1
	PPP2CA
	CDKAL1
	RTN4
	DROSHA
	AQP9
	HLA-DPA1
	INPPL1
	NRG3
	IL16
	DLST
	RHBDF2
	RB1CC1
	GRK2
	PYCARD
	CTRC
	USP7
	SNRNP200
	KHK
	ITPR2
	ADAMTS9
	UBD
	LFNG
	ROBO1
	SERPINB3
	DLG5
	ACSM2A
	RFT1
	TNFRSF4
	BNIP3
	SYNGAP1
	TRMT10A
	TAGLN
	NTS
	UBQLN4
	TAMM41
	DNM3
	CPN1
	SPINK5
	ULK1
	HHIP
	YWHAG
	GPC4
	CDSN
	PABPC1
	YWHAQ
	HIC1
	SAMM50
	DMGDH
	SLC3A2
	PALLD
	GPC6
	CCN1
	CPB2
	ZHX2
	ATP5F1B
	KDM6B
	MLKL
	TUBA8
	PPIF
	IGFBP7
	RPL3
	HNRNPU
	FST
	JAZF1
	SVIL
	UBE2D1
	MAP2K4
	LRRC8A
	PZP
	MAPK12
	CGAS
	LPCAT3
	RPL10A
	GPNMB
	MAP3K11
	ATP8A2
	NCL
	CD82
	SELENOP
	FDPS
	ITLN1
	MAVS
	BIRC2
	NDRG2
	PARVB
	TRIM28
	XPO5
	PLIN5
	UGDH
	MCM3
	CWF19L1
	TXNRD1
	NCAN
	MCM7
	PDGFA
	NAT1
	PER2
	ADRB1
	IMMT
	RPL27
	GTF2I
	YWHAZ
	TLL1
	VEGFB
	TMEM94
	RPS11
	SIK3
	SLC6A9
	INSIG1
	ALCAM
	SLC9A9
	EIF6
	HNMT
	ZMIZ1
	CASP6
	UTRN
	SPHK1
	MBTPS1
	CXCL11
	RICTOR
	SYN2
	NSMCE2
	PPT2
	PRPF3
	MYO18A
	IGHG1
	HNRNPC
	VIL1
	DAXX
	PSMD9
	GNAI2
	EIF4A3
	HYOU1
	AHSA1
	SLC30A9
	RBFOX1
	GBA3
	MMP10
	CCL19
	SPECC1L
	RPS15
	TMSB4X
	PDXK
	CDK8
	PIP
	EEA1
	FYB1
	CLDN2
	NCOA3
	OPRM1
	SLAMF1
	NEDD4
	CFL1
	EXOSC2
	MYF5
	HKDC1
	LOXL2
	CSTA
	MTARC1
	SRSF1
	AKR1B10
	AGPAT1
	BRD2
	TYSND1
	RETNLB
	CXCL16
	MAP2K7
	UFM1
	ATF3
	COMMD1
	MAP3K14
	MCM5
	ARRB1
	FLG2
	IL34
	CXCR5
	MSH5
	GSDMD
	RPTOR
	NUP188
	MRTFA
	RPS15A
	PRSS2
	BBC3
	ASTN2
	DGCR8
	GRHL2
	PLA2G1B
	TRAF1
	MFGE8
	TSHB
	FAF2
	SUCO
	PLB1
	IL27
	SETD1B
	SOCS2
	TMX2
	FCRL3
	RCOR1
	IGFBP5
	CCR9
	UBAP2L
	PSMD2
	GPLD1
	MMP11
	SCTR
	AEBP1
	HLA-DMA
	MARK3
	AGXT2
	HS3ST1
	RPN1
	SIK1
	SFRP5
	GLO1
	DIO1
	ACOT12
	PTBP1
	CXADR
	ZNF513
	SPOP
	SIRT5
	EIF4A2
	SIRT4
	YWHAB
	PRKAG1
	WDR81
	HNRNPM
	TMC4
	DDX5
	MLX
	SYVN1
	RACK1
	AIM2
	NFKBIL1
	INS-IGF2
	CCN4
	CROCC
	USP1
	P2RX4
	THBS3
	HNRNPL
	HSF1
	IGF2BP1
	INSIG2
	OSMR
	TET3
	YTHDC2
	RPLP2
	DDX39B
	NPEPPS
	FAT1
	HLA-DQA2
	SLC17A3
	DDRGK1
	PTCD1
	SESN2
	IFNL4
	NEDD9
	AQP7
	DDAH2
	ADAMTS18
	SLC7A11
	RING1
	RPL6
	CXCR6
	LCN1
	CELSR2
	KCNQ3
	MYH10
	DCLK1
	PSMC2
	RPL13
	RPS18
	TCP1
	NUP85
	FNDC3B
	JCAD
	DNAJA1
	H2BC21
	TRPV6
	CUX2
	DLG2
	UROC1
	AHNAK
	HMMR
	PRKCE
	HBS1L
	RREB1
	ORM1
	DERL1
	CYGB
	LUM
	MOGAT2
	DNMBP
	CCNC
	RGS6
	ESM1
	PARD3
	CAND1
	APOF
	SAR1A
	GPC5
	KDM4B
	YBX3
	PEG10
	RPL8
	SERPIND1
	RPS23
	PCSK5
	WDR1
	S100A7
	MYO1C
	PUF60
	PRKAB2
	BAG5
	MYO1B
	INHBE
	SRSF6
	EIF3F
	ZNF365
	C12orf43
	HMGCS1
	SUGP1
	APLNR
	NRG4
	H4C6
	RPL7A
	LOXL1
	EHBP1L1
	HNRNPUL1
	CD5L
	LAP3
	TRIB3
	STAG1
	IL25
	SMURF1
	FAP
	EIF4A1
	TWIST2
	ABHD10
	PCBP2
	RPLP1
	PPP1CA
	LTB
	MACROD2
	VSIG4
	KANK4
	USP14
	FUNDC2
	GRM5
	TAX1BP1
	GCN1
	OTUD5
	H1-4
	ARPC2
	S100A6
	ATP5MF
	TPM4
	RPL7
	AQP3
	RANGAP1
	KRTCAP3
	DPH1
	CAMKK2
	ITSN1
	TET1
	UFL1
	EIF3B
	PNLIPRP2
	FPR2
	H4C3
	ZBTB7A
	SRRM2
	SERPINB4
	MTX1
	SEMA5A
	SLC25A11
	GDF11
	PCSK7
	FETUB
	EFNA1
	ACTR2
	PFKFB3
	TIMP4
	GSTK1
	PIGC
	RUVBL2
	IL1F10
	SEC16A
	AMPH
	ENHO
	GATAD2A
	TM4SF5
	ELK1
	GABRA2
	PCBP1
	DYNLL1
	USP20
	RNF5
	BAMBI
	CAPZA2
	VPS37D
	ITIH2
	AP2A2
	ACTR3
	UBE2N
	CMKLR1
	TRIM33
	SERPINA4
	CCT8
	TMEM63B
	HNRNPF
	SIRT7
	GGT2P
	TUBA1C
	HLA-DQB2
	IL22RA1
	DDX1
	RAB32
	FARP1
	TNFRSF12A
	RPS4X
	ILF3
	RPS9
	PHF1
	HIF1AN
	TRIM31
	ZFP36
	H2AC20
	PDGFC
	CCAR2
	HLA-DMB
	AP2B1
	METTL3
	SLC17A1
	NELFE
	ATXN2L
	EXOC3L4
	DAP3
	RPS5
	CCRL2
	SAT1
	LRRFIP2
	G0S2
	WWP2
	RPL4
	LAMP3
	NFE2
	RPL9
	H4C1
	SLC46A3
	LEPROT
	SF3B3
	DHX15
	SLC44A1
	ZP4
	INHBA
	NFIC
	LCP1
	DDX17
	CMIP
	POMP
	MFAP2
	GPR55
	CERS5
	HSPH1
	P4HA1
	SIK2
	AP2A1
	TAOK1
	SNRPD2
	MAP3K8
	SDC4
	OLFM4
	ESRRG
	SLC23A1
	LEMD2
	RPS2
	RPS3A
	HSCB
	CCT4
	TPT1
	BLOC1S2
	FGL2
	MAPK13
	SRP68
	CIDEA
	KHDRBS3
	TGM3
	MLEC
	PDIA4
	EIF3E
	RPL12
	TMBIM1
	CEP192
	STK3
	AATF
	PABPC4
	DUSP22
	PNPLA7
	SRSF4
	HSD17B1
	PIK3R3
	NUCB2
	CNTN5
	RSPO3
	ATRN
	NMT2
	CALD1
	ST8SIA1
	GNA12
	H4C5
	SLC39A12
	PSG1
	GGT5
	CEBPG
	HSPA2
	LIAT1
	CCT3
	STX17
	TACR2
	SLC25A47
	TTC28
	NFKBIE
	NFE2L1
	ADAM15
	ZBTB17
	NLRP2
	H4C11
	IRX3
	RPS8
	RRBP1
	YIPF1
	HLX
	PDIA6
	VIRMA
	RPL23A
	GADD45G
	SENP3
	PKNOX1
	HCAR2
	BCAT1
	CPLANE2
	MNT
	PHF2
	REPIN1
	RBM14
	CIDEB
	H4C16
	RGL2
	RPL24
	PLA2G2F
	RPL30
	STK24
	VPS52
	SRRM1
	USP11
	HNRNPA3
	TTF2
	LPIN3
	DCD
	WBP2
	TP53INP1
	GPSM3
	RTRAF
	SLC18A1
	EFNA3
	TNFSF18
	GGA3
	MYDGF
	RGS4
	STX6
	MAU2
	DEPTOR
	SIDT2
	PGAM5
	TXNL1
	TMOD3
	H4C9
	SRSF7
	CERS4
	BUD13
	TLCD1
	RPS16
	HLA-DOA
	H4C8
	MYBBP1A
	ILF2
	E2F2
	NECAP2
	BMP3
	HSPB6
	EIF5
	TRIM47
	RPL37A
	ANAPC5
	VAV2
	MYO1D
	SLC23A2
	TLCD4
	B3GALT4
	EDC4
	BTN3A2
	SMPD3
	OSBPL3
	CUL4A
	SLC26A6
	POLR2D
	MORF4L1
	FBXO42
	EGFL8
	MAP3K4
	PTPRG
	CDK3
	HILPDA
	DNAJC15
	KHDC4
	TM2D1
	H1-3
	TNFRSF19
	SEC16B
	TP53BP2
	NUDT21
	COP1
	ARPC4
	H4C13
	APPL2
	RGS5
	XPO4
	CDKN2AIP
	DEFA1
	MYO1A
	SRR
	COBLL1
	MACROH2A2
	WTAP
	LATS2
	KLF10
	FBXO2
	CRTC1
	ANGPTL2
	PDE1C
	ARL15
	BMP8B
	MYL6
	DMRTA1
	PLXNA2
	UBXN1
	POLR3H
	USP4
	CRACR2A
	TMEM97
	H4C14
	ALDH1L2
	ARRDC3
	THRAP3
	TNFAIP2
	H4C12
	LLGL2
	UBA52
	ATF6B
	SORCS3
	AS3MT
	TARBP1
	KRTCAP2
	ZNF827
	MICAL3
	CDH6
	RNGTT
	UBE2D3
	UBE2D2
	PES1
	ZC3H12A
	PBXIP1
	PHLDB2
	HRNR
	SLC17A9
	CHST8
	PDIA2
	RNF6
	UBR2
	H4C2
	CCAR1
	H4C4
	H4C15
	TAFA5
	S100A11
	IL36A
	SAP30BP
	PSD3
	C1QTNF9
	BPIFA1
	CILP2
	PPP1R17
	TOR1B
	HSPB7
	FAM107B
	IBTK
	ANXA9
	OPRD1
	EIF3L
	SLF2
	MAD2L1BP
	COPS6
	OTUB1
	PLPPR4
	SEL1L3
	VMP1
	DDX60L
	NUPR1
	PTPRU
	MRPL43
	MKRN2
	HIF3A
	TXNDC5
	SMG6
	H2BC4
	SELENOW
	PACSIN2
	XXYLT1
	CKAP4
	GPR26
	RTCB
	RNF214
	FAM3B
	RNF114
	ATG3
	L3MBTL3
	USP10
	STK19
	LILRB2
	MARCHF7
	ZNF318
	PHLPP1
	METTL14
	SLC17A2
	H2BC11
	SLC50A1
	C1QTNF3
	CHST2
	P2RY6
	PABIR1
	FAM215A
	ZNF512
	GTF3C2
	TRIM59
	ST18
	INTS8
	C1QTNF1
	CRELD2
	KLHL8
	HLA-DOB
	SNX8
	TSC22D4
	TNFAIP8L2
	SNX17
	CREBZF
	LMO7
	DUSP14
	C9orf78
	KLF3
	OLFM2
	TINAG
	COL21A1
	TAF11
	TRIM65
	SUB1
	DXO
	HSD17B11
	DDX50
	WDR46
	USP5
	LY6G5B
	SLC2A8
	C11orf58
	SPOUT1
	AKNA
	TSKU
	LZTS2
	RLN2
	TMBIM6
	C1QTNF4
	TMX1
	GON4L
	ATG4C
	UBXN10
	KPRP
	CNOT7
	C4orf54
	GPANK1
	STK25
	CAMK1G
	LYPLAL1
	SAP18
	NBPF1
	SH3BP5
	NYAP2
	FAM171A1
	RAB24
	PLCXD2
	ZNF638
	FAM3A
	SMOC2
	LINC00322
	ITGB3BP
	TATDN1
	DCLK2
	RGS14
	IGHG4
	ZNF267
	SENP2
	H2BC18
	GPR39
	DNAJC11
	SCARF1
	SUCNR1
	RWDD3
	EBNA1BP2
	STK26
	DDX46
	KIFC1
	SPPL3
	FSTL3
	IRAK1BP1
	GID4
	DNAJB12
	DESI1
	USP13
	IL36B
	CHD9
	SERPINB12
	UNK
	PCOLCE
	NT5C
	RPS4Y2
	OVCA2
	PDAP1
	RAMP3
	PPDPF
	ARHGEF19
	ANKK1
	TTYH3
	MYH4
	GLT8D2
	DUSP26
	C5orf67
	DRG2
	BUD31
	CHST12
	TRPC4AP
	STK17B
	SAPCD1
	TJAP1
	RFLNB
	MAS1
	HSP90AA2P
	TMEM120A
	CENPW
	CARD6
	NUDT4
	TLCD2
	LENG1
	IP6K1
	SLC43A2
	SCGN
	FKBPL
	SDF2L1
	PLEKHF2
	VGLL4
	WDR82
	LRRC75B
	EYA2
	HTR1E
	RUBCNL
	MYL6B
	RND3
	GBP2
	INSC
	PIP5K1B
	TRIM38
	TNFAIP8L1
	FSTL4
	ZNF101
	DNAAF9
	SLC17A4
	CR1L
	TRIM67
	RIMKLA
	HMCES
	CRACR2B
	CLGN
	PLEKHO1
	HIGD1A
	MIF4GD
	TMEM132B
	CTDNEP1
	CASKIN2
	CDR2L
	LINC02694
	PRMT3
	AMZ1
	SBSN
	CAND2
	MAIP1
	LAPTM5
	CCDC63
	ZNF300
	ALPK2
	PHLPP2
	ISM1
	SEC14L3
	MS4A7
	C8orf34
	KRTAP5-5
	HERPUD2
	EID1
	ARHGAP8
	TRIM45
	PWWP3A
	CENPM
	BCL2L14
	NAT9
	MON1B
	AGTRAP
	DNAJC10
	MYL12B
	RBIS
	CDH26
	FAM131C
	FAIM
	PSME2
	TNIP3
	ZNF701
	TLCD3A
	SNRNP40
	LINC01619
	MXD3
	GALR1
	TMEM170B
	FAM3D
	TRMT12
	CCDC117
	DDX60
	PIWIL3
	TAGLN3
	CAPSL
	SDR42E1
	AGR3
	SHC4
	CD300A
	FBXO30
	MEI4
	GGT3P
	NMBR
	PHLDA1
	C16orf95
	SPATA21
	SMLR1
	CFAP299
	SMIM20
	SPDL1
	MYO15B
	NREP
	HNRNPCL1
	HERC4
	SGIP1
	SLC9C2
	SMIM29
	GPR180
	CROCCP3
	SOCS7
	OSTN
	NLRC3
	TOGARAM2
	ZG16B
	RD3L
	YIPF6
	SH3RF2
	TM6SF1
	OR10J5
	FAM174A
	CIMIP2B
	IGKV2-29
	IGLV2-11
	OR1L3
